# Supplementary material for: Sexuality Education in the Digital Age: Modelling the Predictors of Acceptance and Behavioural Intention to Access and Interact with Sexuality Information on Social Media
Source: Springer Nature journal article supplement (doi:10.1007/s13178-021-00619-1), 2021-07-29
Supplement: MOESM1 [file 19404364]

# **Supplementary Information**

Table S1: Sociodemographic characteristics of “attentive” young adults in the sample

| **Characteristics** | **Net Sample** | **Unweighted Percentage**  **(n = 585)** | **Weighted Percentage**  **(n = 585)** |
| --- | --- | --- | --- |
| **Sex** | | | |
| Female | 353 | 60.34 | 56.82 |
| Male | 232 | 39.66 | 43.18 |
| **Country** | | | |
| Kenya | 257 | 43.93 | 43.59 |
| Nigeria | 183 | 31.28 | 29.67 |
| South Africa | 145 | 24.79 | 26.73 |
| **Education** | | | |
| < Tertiary | 194 | 35.02 | 36.30 |
| Tertiary/Higher | 360 | 64.98 | 63.70 |
| **Relationship Status** | | | |
| Not married: not in relationship | 285 | 48.72 | 48.03 |
| Not married: in a relationship | 261 | 44.62 | 44.75 |
| Married/Living with Partner | 39 | 6.67 | 7.22 |

Table S2: Summary of model fit indices and recommended values

| **Fit statistics** | **Recommended Value** | **Weighted Net Sample**  **(n = 585)** | **Unweighted Net Sample**  **(n = 585)** | **Gross Sample**  **(n = 936)** |
| --- | --- | --- | --- | --- |
| Chi-Square (X^2) |  | 377.789 | 373.680 | 458.472 |
| Degree of Freedom (DF) |  | 192.000 | 192.000 | 192.000 |
| Chi-Square (X^2)/Degree of Freedom (DF) | ≤ 3.00 | 1.968 | 1.946 | 2.388 |
| Probability Value (p-value) | ≥ 0.05 | 0.000 | 0.000 | 0.000 |
| Root Mean Square Error Approximation (RMSEA) | ≤ 0.05 | 0.041 | 0.040 | 0.039 |
| Standardized Root Mean Squared Residual (SRMR) | ≤ 0.08 | 0.051 | 0.053 | 0.043 |
| Tucker-Lewis index (TLI) | ≥ 0.95 | 0.965 | 0.965 | 0.966 |
| Comparative fit index (CFI) | ≥ 0.95 | 0.972 | 0.973 | 0.973 |
| Penalized Normed Fit Index (PNFI) | ≥ 0.60 | 0.747 | 0.747 | 0.754 |
